# Supplementary figures and images for: Multi-Level Interactions between the Nuclear Receptor TRα1 and the WNT Effectors β-Catenin/Tcf4 in the Intestinal Epithelium
Source: PubMed Central journal article supplement (PMC3317923; doi:10.1371/journal.pone.0034162), 2012-04-03

Sirakov et al., Figure S2

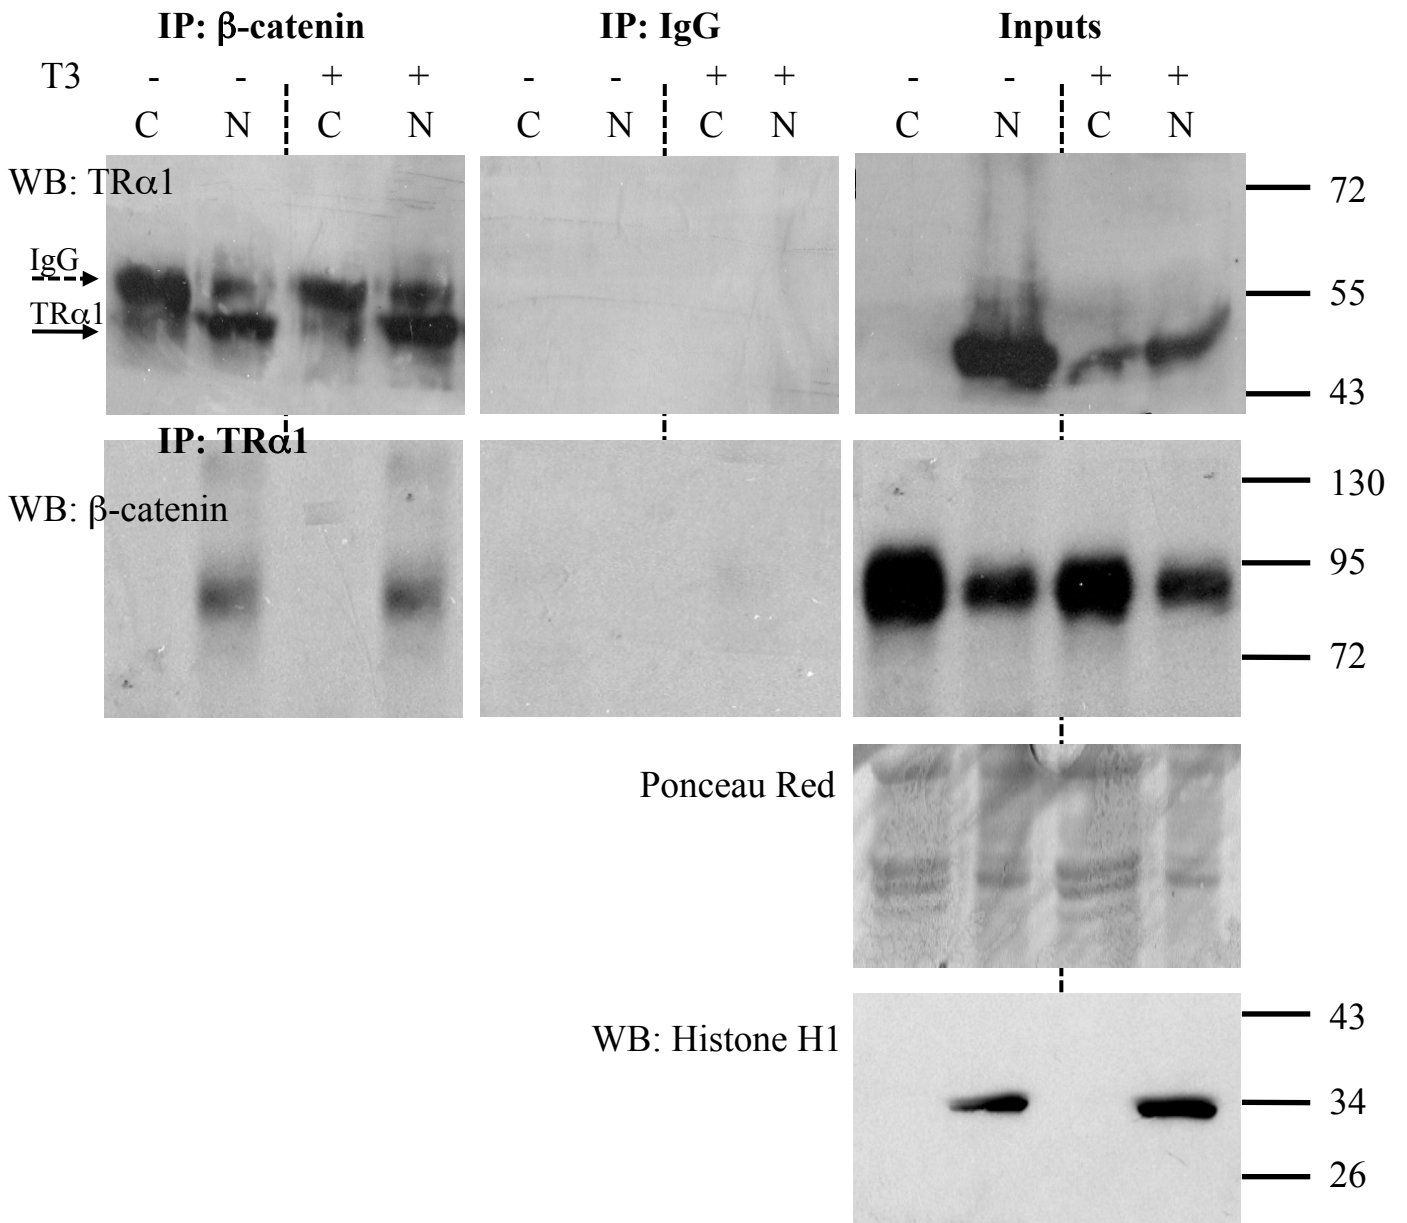

Supplement: pone.0034162.s002.pdf [file pone.0034162.s002.pdf]

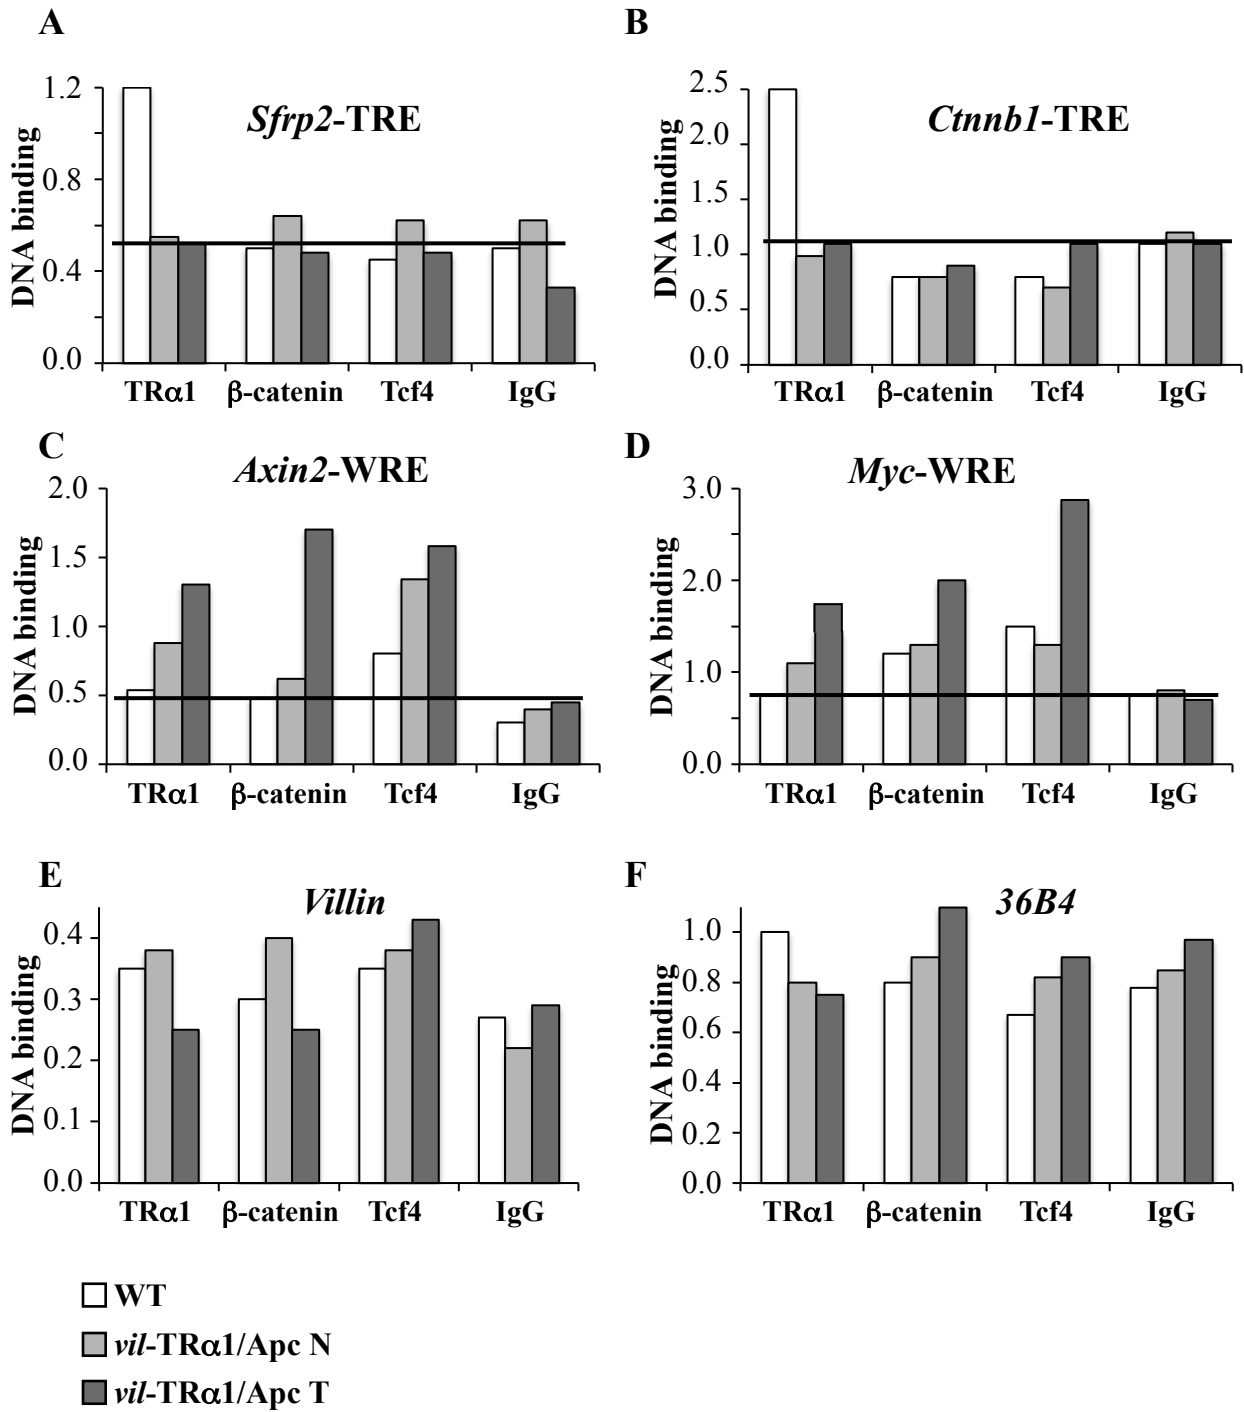

Supplement: pone.0034162.s003.pdf [file pone.0034162.s003.pdf]

Sirakov et al., Figure S4

**A**

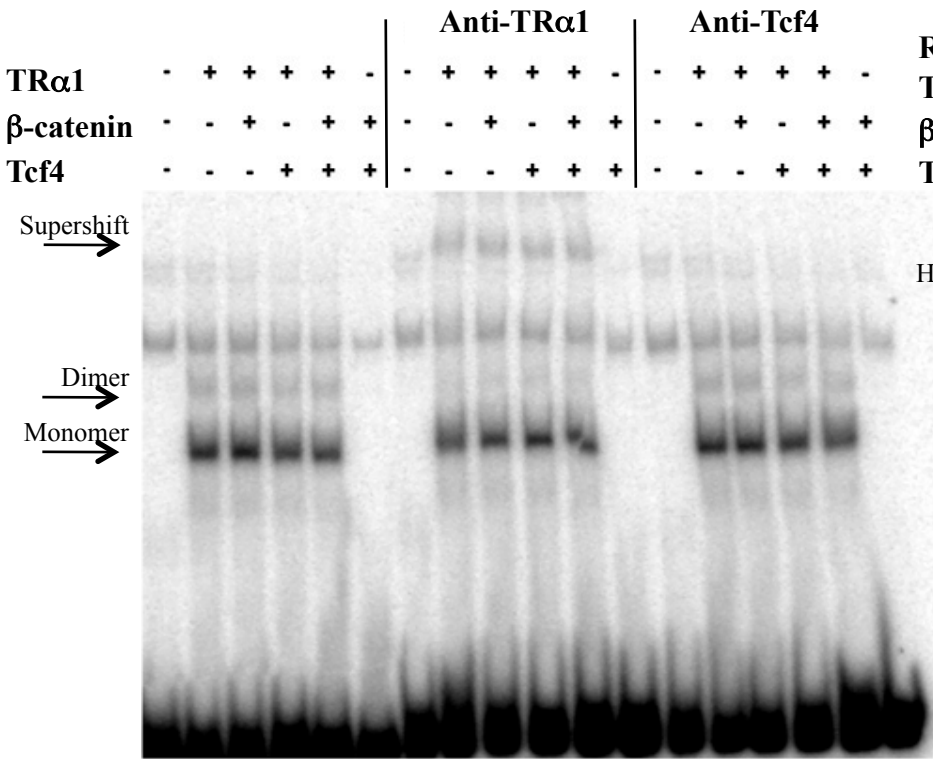

**B**

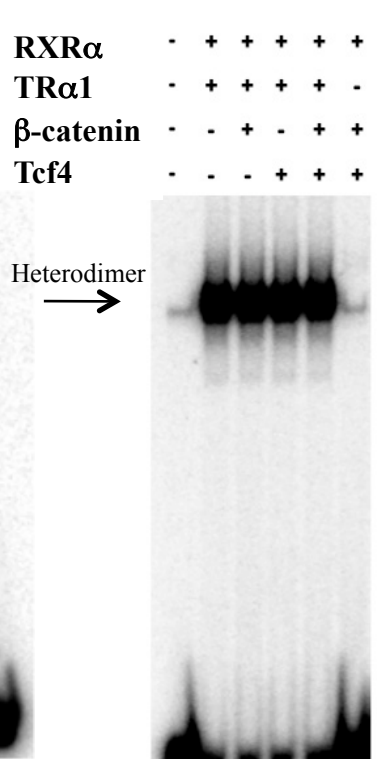

Supplement: pone.0034162.s004.pdf [file pone.0034162.s004.pdf]
